# Supplementary material for: Nanoliter-scale, regenerable ion sensor: sensing with a surface functionalized microstructured optical fibre
Source: Royal Society of Chemistry journal article supplement (doi:10.1039/c3ra40321a), 2013-01-01
Supplement: c3ra40321a.pdf [file c3ra40321a.pdf]

## Supporting Information for

# Nanoliter-scale, Regenerable Ion Sensor: Sensing with Surface Functionalized Microstructured Optical Fiber

### Mass Spectrum SmartFormula Report

#### Analysis Info

Analysis Name D:\Data\STUDENT DATA\EXTERNAL\ABELL\ABELL\_14112012\_SH12016\_3732.d  
Method pos\_tune\_wide\_lc\_mp.m Acquisition Date 11/14/2012 10:47:56 AM  
Sample Name SH12016 Instrument / Ser# maXis 10152  
Comment

#### Acquisition Parameter

|             |            |                       |            |                  |           |
|-------------|------------|-----------------------|------------|------------------|-----------|
| Source Type | ESI        | Ion Polarity          | Positive   | Set Nebulizer    | 1.0 Bar   |
| Focus       | Not active | Set Capillary         | 4000 V     | Set Dry Heater   | 200 °C    |
| Scan Begin  | 300 m/z    | Set End Plate Offset  | -500 V     | Set Dry Gas      | 8.0 l/min |
| Scan End    | 2900 m/z   | Set Collision Cell RF | 3000.0 Vpp | Set Divert Valve | Waste     |

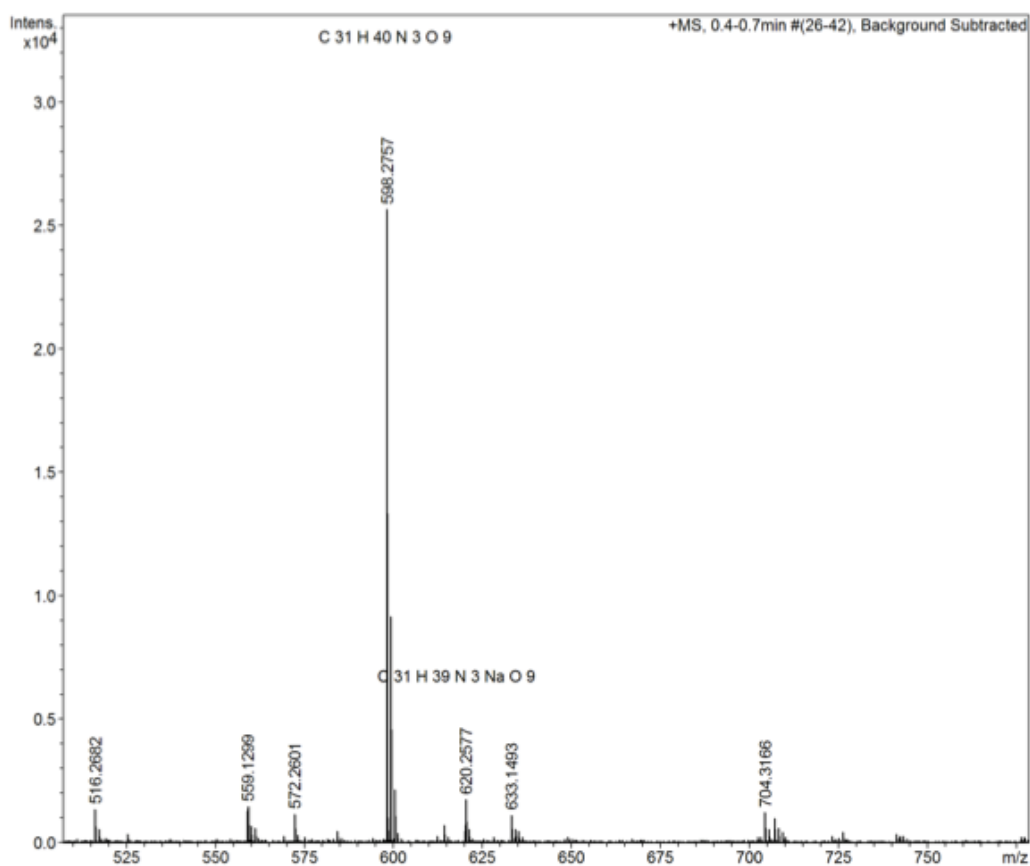

## Analytical HPLC Results:

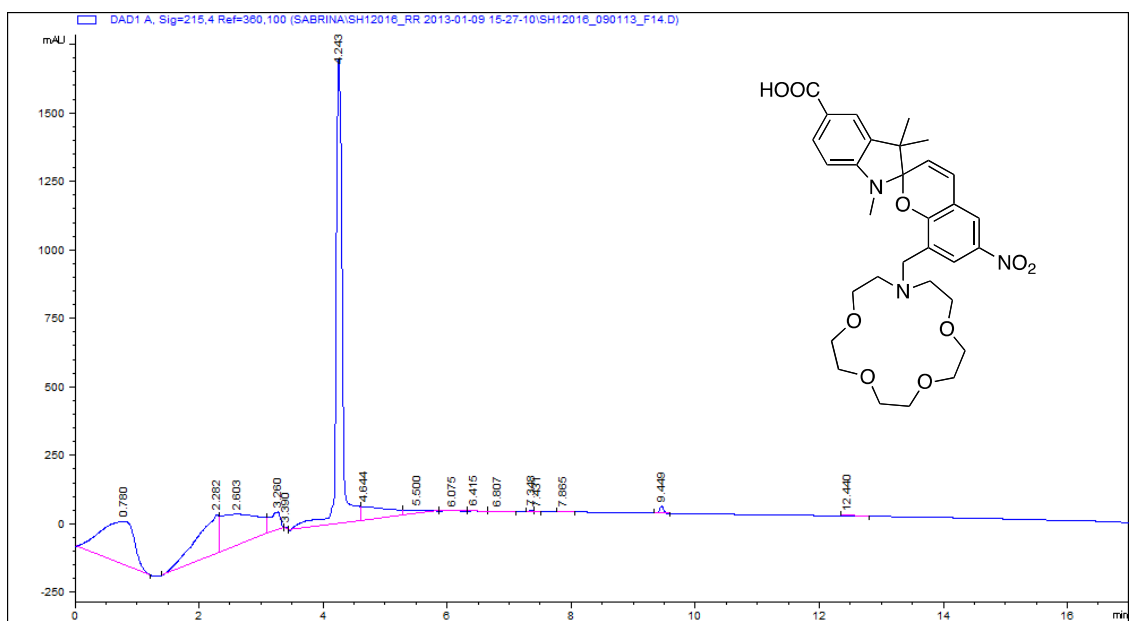

Column: Agilent Eclipse plus C18, 5  $\mu$ m, 4.6 x 260 mm

Conditions: 20-100% Acetonitrile over 20 min.
